# Supplementary material for: Health Care Needs in School-Age Refugee Children
Source: MDPI journal article supplement (doi:10.3390/ijerph16214255), 2019-11-01
Supplement: s2 [file s2]

## Appendix.

Malmö city

### MEDICAL ASSESSMENT OF NEWLY ARRIVED CHILDREN FROM ABROAD

Date: 

|  |  |  |
|--|--|--|
|  |  |  |
|--|--|--|

|                            |   |               |  |
|----------------------------|---|---------------|--|
| Name                       | 0 |               |  |
| Surname                    | 0 |               |  |
| ID                         | 0 |               |  |
| Address:                   | 0 |               |  |
| Postal code                | 0 | Phone         |  |
| Country of birth           | 0 | Mother tongue |  |
| Date of arrival in Sweden  |   |               |  |
| Place of arrival in Sweden |   |               |  |

#### If yes on any of these question-immediate referral to Refugee health clinic

|                                              |     |    |
|----------------------------------------------|-----|----|
| Affected general condition                   | Yes | No |
| Jaundice(eyes and/or skin)                   | Yes | No |
| Diarrhea                                     | Yes | No |
| Longstanding cough                           | Yes | No |
| Longstanding fever                           | Yes | No |
| Acute contagious skin disorder (scabies etc) | Yes | No |
| Mouth and throat infection                   | Yes | No |
| Abnormal fatigue                             | Yes | No |

|                                                    |     |    |
|----------------------------------------------------|-----|----|
| Anemia, marked pallor                              | Yes | No |
| Previous hospital admission with blood transfusion | Yes | No |
| Night sweat                                        | Yes | No |
| Family relation has ongoing infection              | Yes | No |

**If yes on any of these questions, communicate result to school nurse/physician in the school the student will attend**

|                                                |     |    |
|------------------------------------------------|-----|----|
| History of poor growth                         | Yes | No |
| History of poor eyesight                       | Yes | No |
| History of impaired hearing                    | Yes | No |
| History or sign of disability                  | Yes | No |
| History of severe psychological trauma         | Yes | No |
| History of other psychological problem         | Yes | No |
| Caretaker has concern about the child's health | Yes | No |

### Information to school health nurse at the receiving school

|                                                       |        |       |    |
|-------------------------------------------------------|--------|-------|----|
| Does the caretaker think the child is in good health? |        | Yes   | No |
| Comment                                               |        |       |    |
| Any ongoing medication?                               |        | Yes   | No |
| Comment                                               |        |       |    |
| History of allergies?                                 |        | Yes   | No |
| Comment                                               |        |       |    |
| Weight (kg):                                          |        |       |    |
| Height (cm):                                          |        |       |    |
| Back:                                                 | Grade: |       |    |
| Vision:                                               | Right: | Left: |    |

|                        |                                                                           |  |       |  |  |  |  |
|------------------------|---------------------------------------------------------------------------|--|-------|--|--|--|--|
| Hearing:               | Right:                                                                    |  | Left: |  |  |  |  |
| Teeth:                 |                                                                           |  |       |  |  |  |  |
| Sleep:                 |                                                                           |  |       |  |  |  |  |
| Food:                  |                                                                           |  |       |  |  |  |  |
| BCG-SCAR               | Yes.      No.                                                             |  |       |  |  |  |  |
| Testicles:             | Yes, according to caretaker      No, according to caretaker.      Unknown |  |       |  |  |  |  |
| Age of menarche:       | Year:                                                                     |  |       |  |  |  |  |
| Previous vaccinations: |                                                                           |  |       |  |  |  |  |
| Other:                 |                                                                           |  |       |  |  |  |  |

### Referrals

|                                                     |
|-----------------------------------------------------|
| Student referred to:                                |
| Comment                                             |
| Communication with attending school nurse/physician |
| Comment                                             |
| Screening made by:                                  |

### Student can attend classes

|            |  |
|------------|--|
| Date:      |  |
| Signature: |  |
